# Supplementary material for: Propagating rifts: the roles of crustal damage and ascending mantle fluids
Source: Copernicus journal article supplement (doi:10.5194/se-15-747-2024), 2024-07-05
Supplement: Supplementary file 1 [file se-15-747-2024-supplement.pdf]

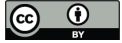

*Supplement of*

## **Propagating rifts: the roles of crustal damage and ascending mantle fluids**

**Folarin Kolawole and Rasheed Ajala**

*Correspondence to:* Folarin Kolawole (foia@ldeo.columbia.edu)

The copyright of individual parts of the supplement might differ from the article licence.

## **Supplement**

### **Contents of this file**

Figures S1 to S24

### **Introduction**

This supplementary document contains supplemental figures (Figures S1 – S24) supporting the results and conclusions in the main manuscript.

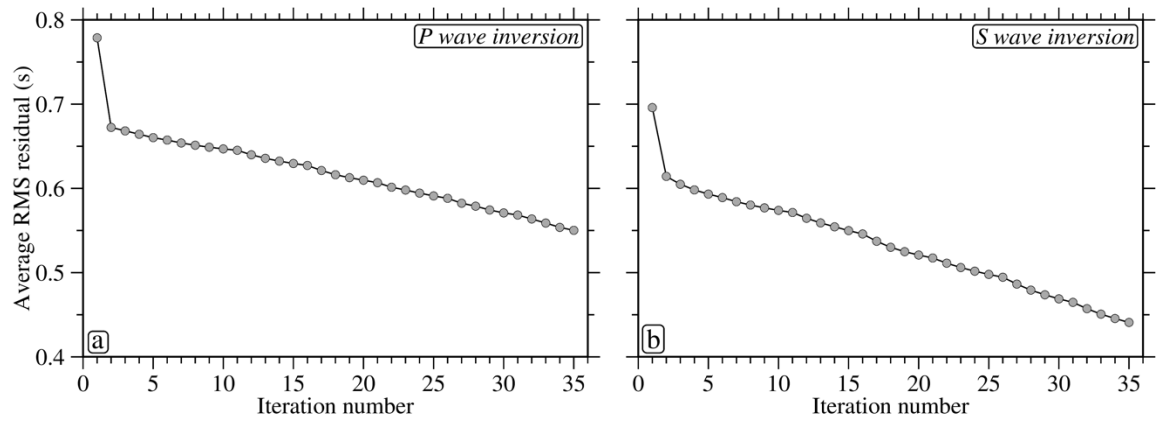

**Figure S1.** Average RMS travel time residuals for the **(a)** P and **(b)** S inversion.

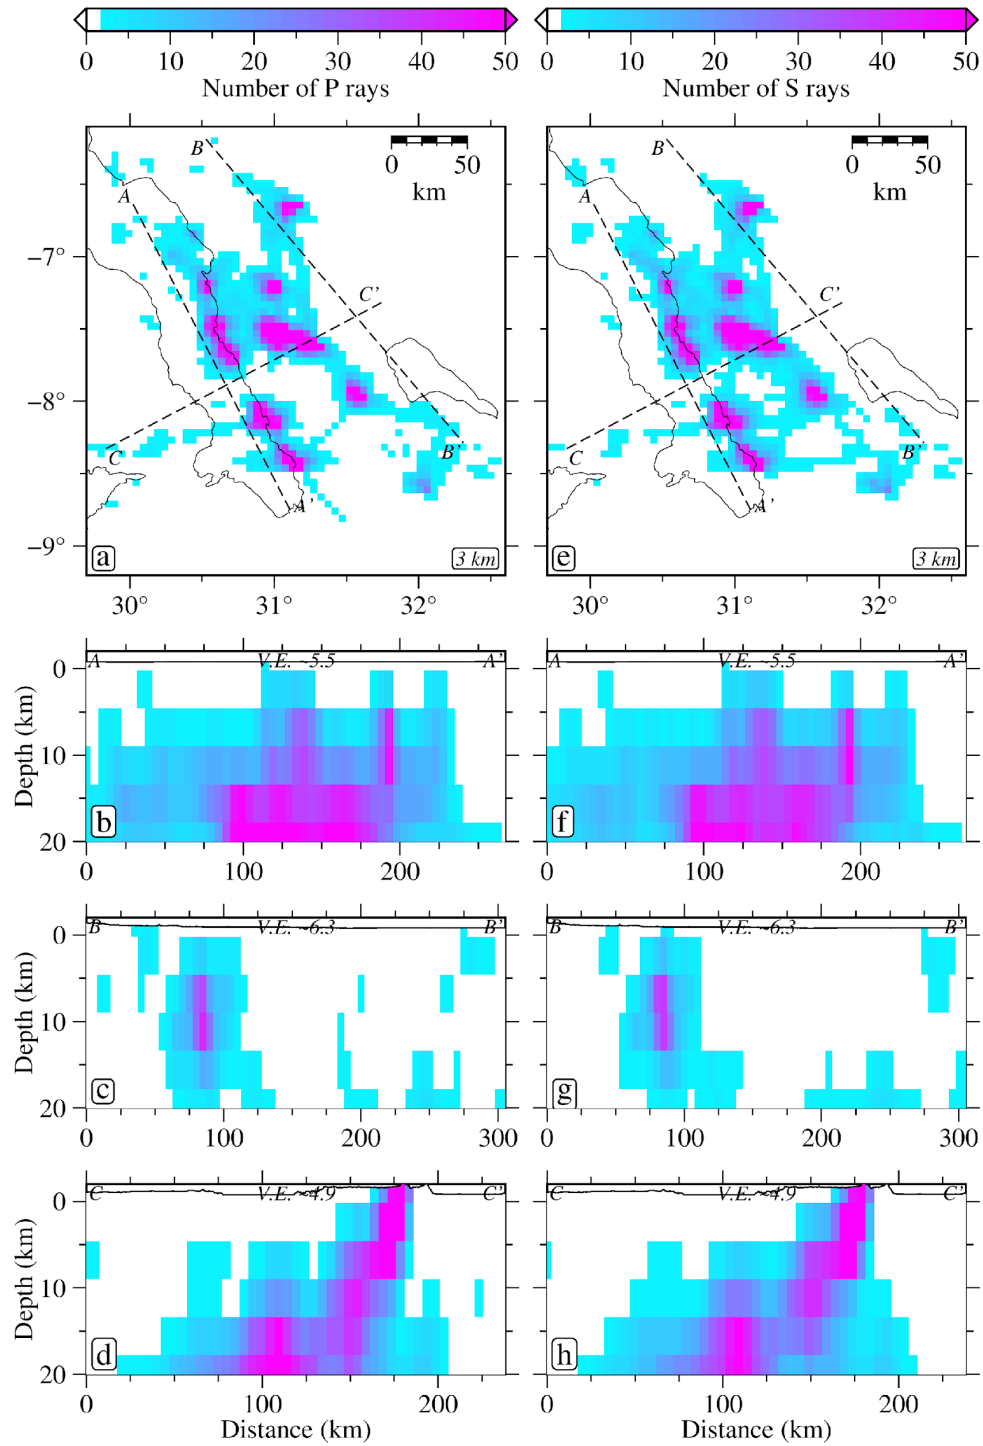

**Figure S2.** Ray coverage maps for the inversion. (a – d). Maps and profiles for the P wave model. (e – h) Maps and profiles for the S wave model.



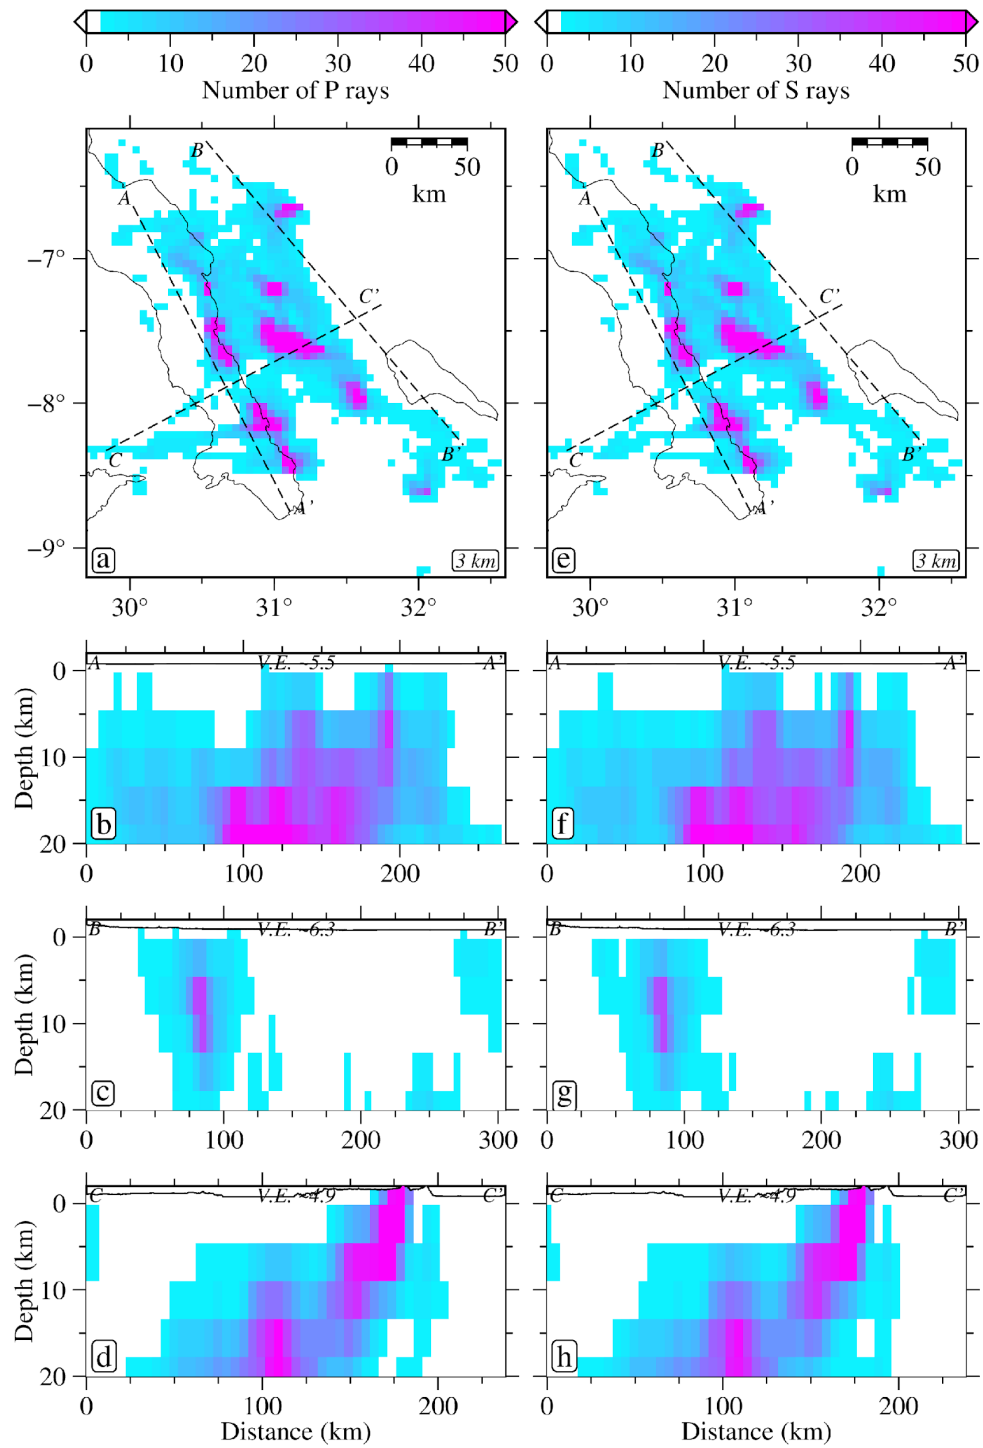

**Figure S3.** Same as Fig. S2 but for the synthetic model inversion.

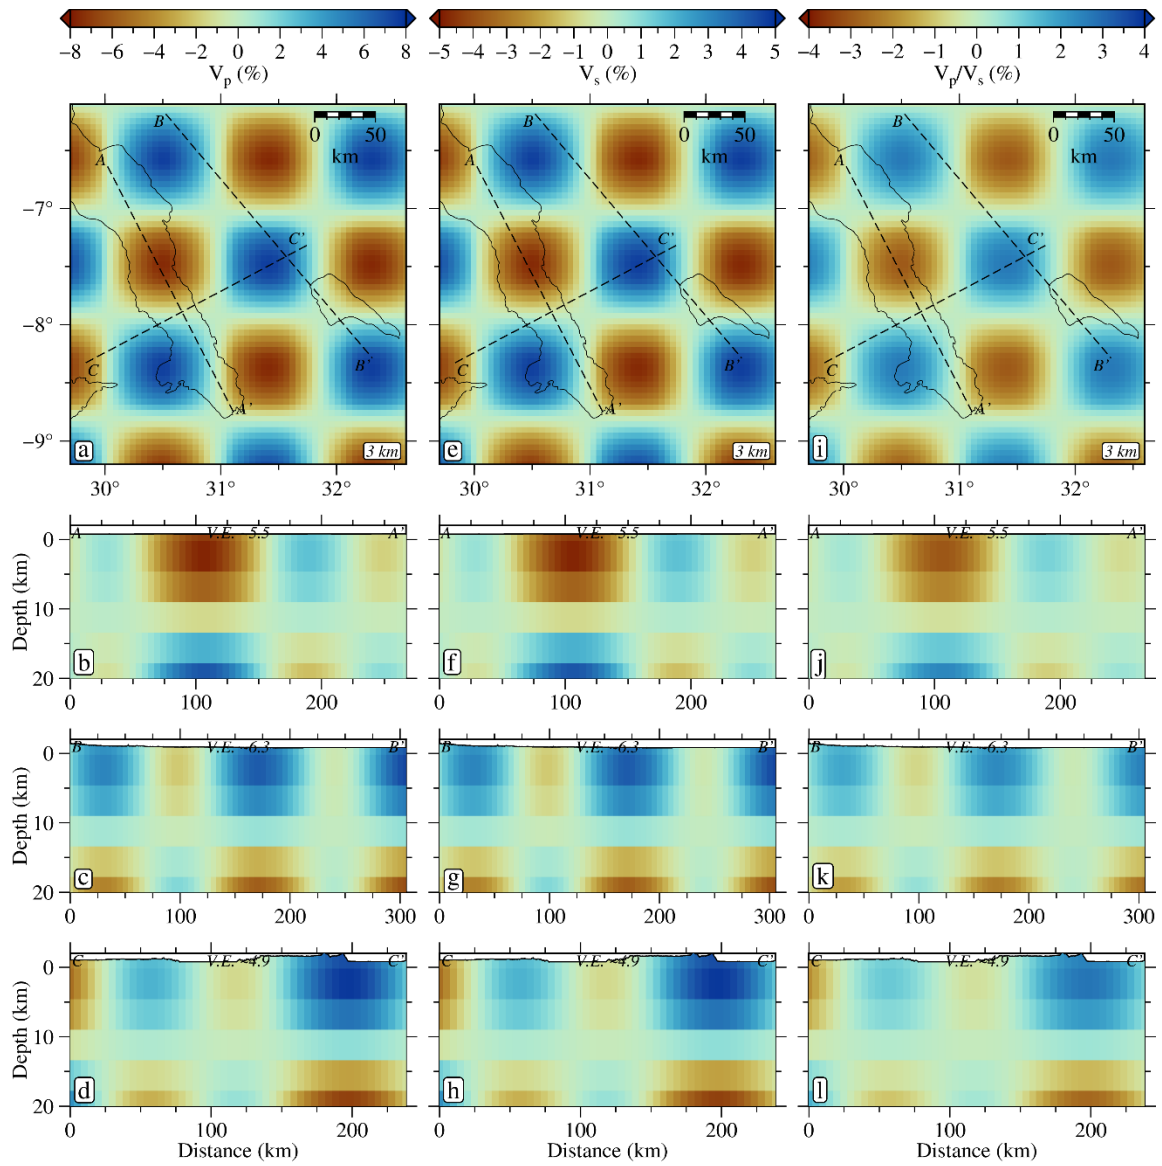

**Figure S4.** True synthetic model with 100 km x 100 km x 25 km checkers.

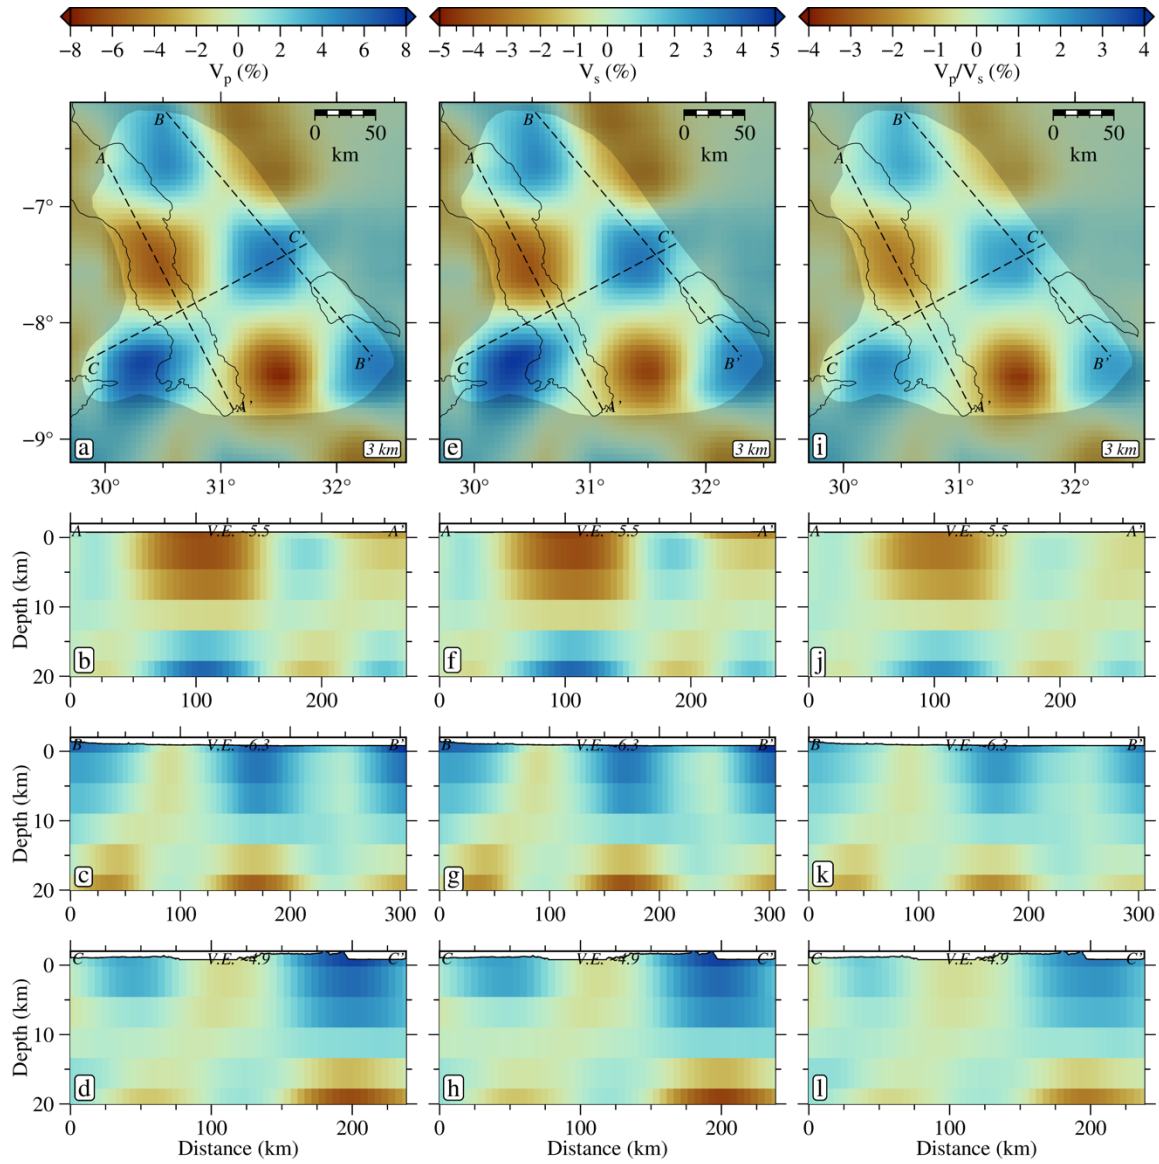

**Figure S5.** Recovered synthetic model with 100 km x 100 km x 25 km checkers. Unreliable areas of the models are lightly grayed out on the maps.

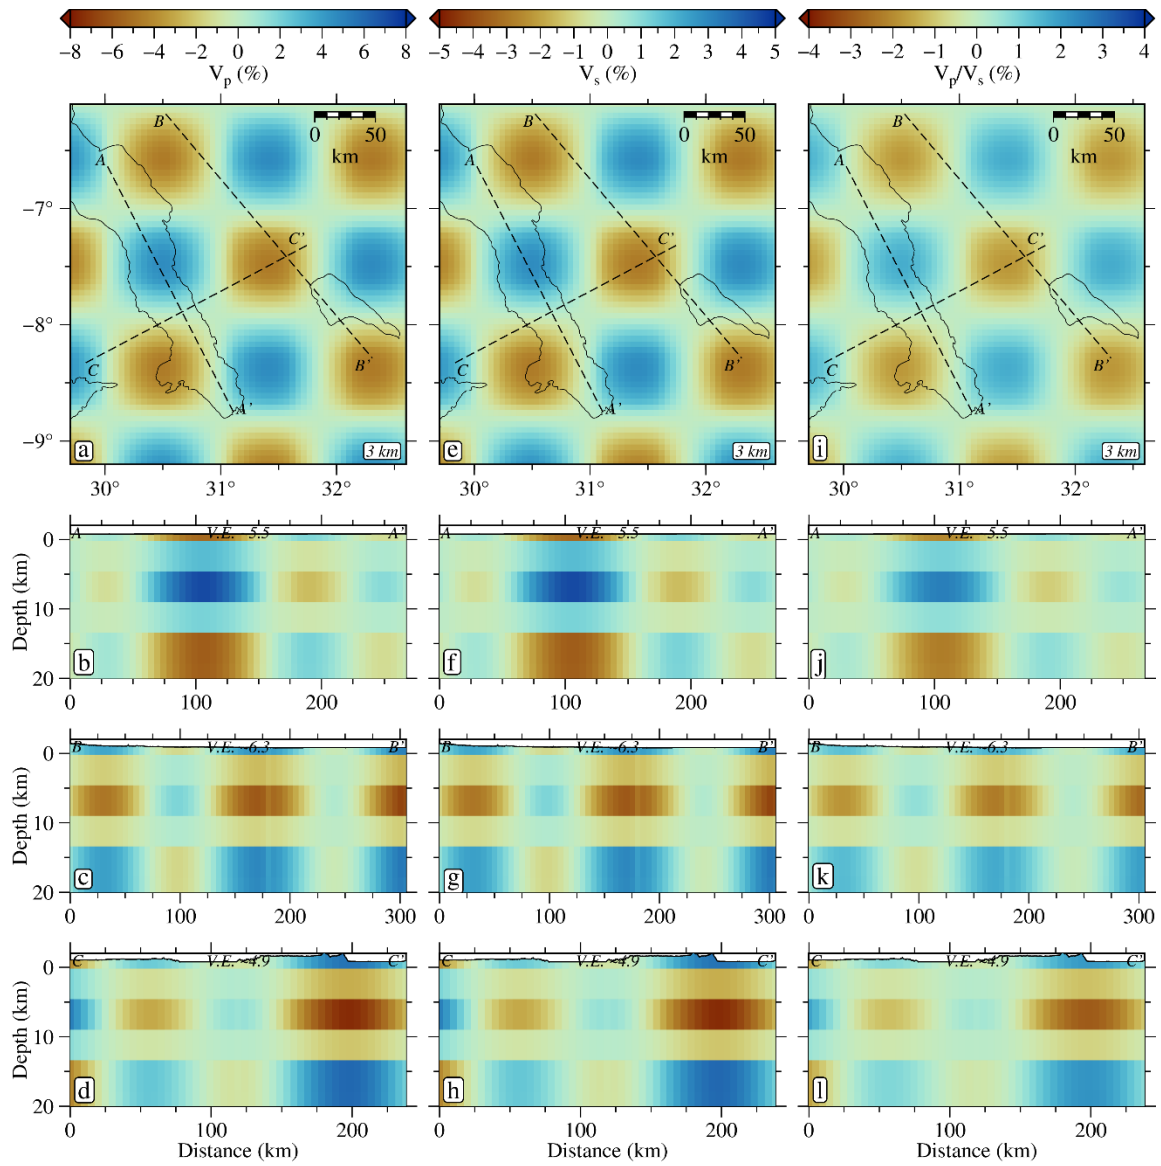

**Figure S6.** True synthetic model with 100 km x 100 km x 12.5 km checkers.

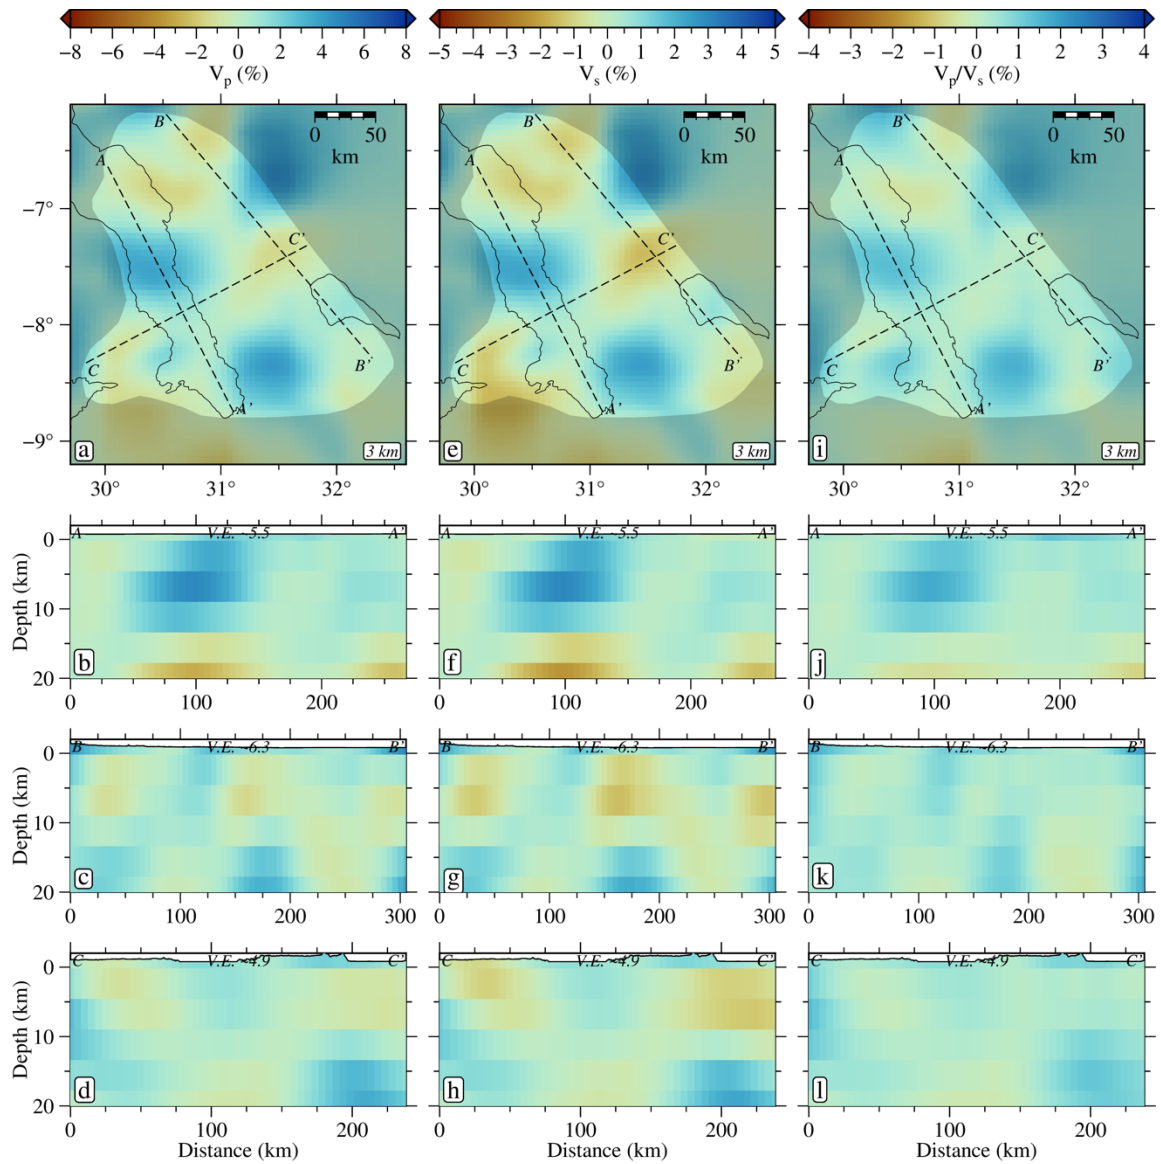

**Figure S7.** Recovered synthetic model with 100 km x 100 km x 12.5 km checkers. Unreliable areas of the models are lightly grayed out on the maps.

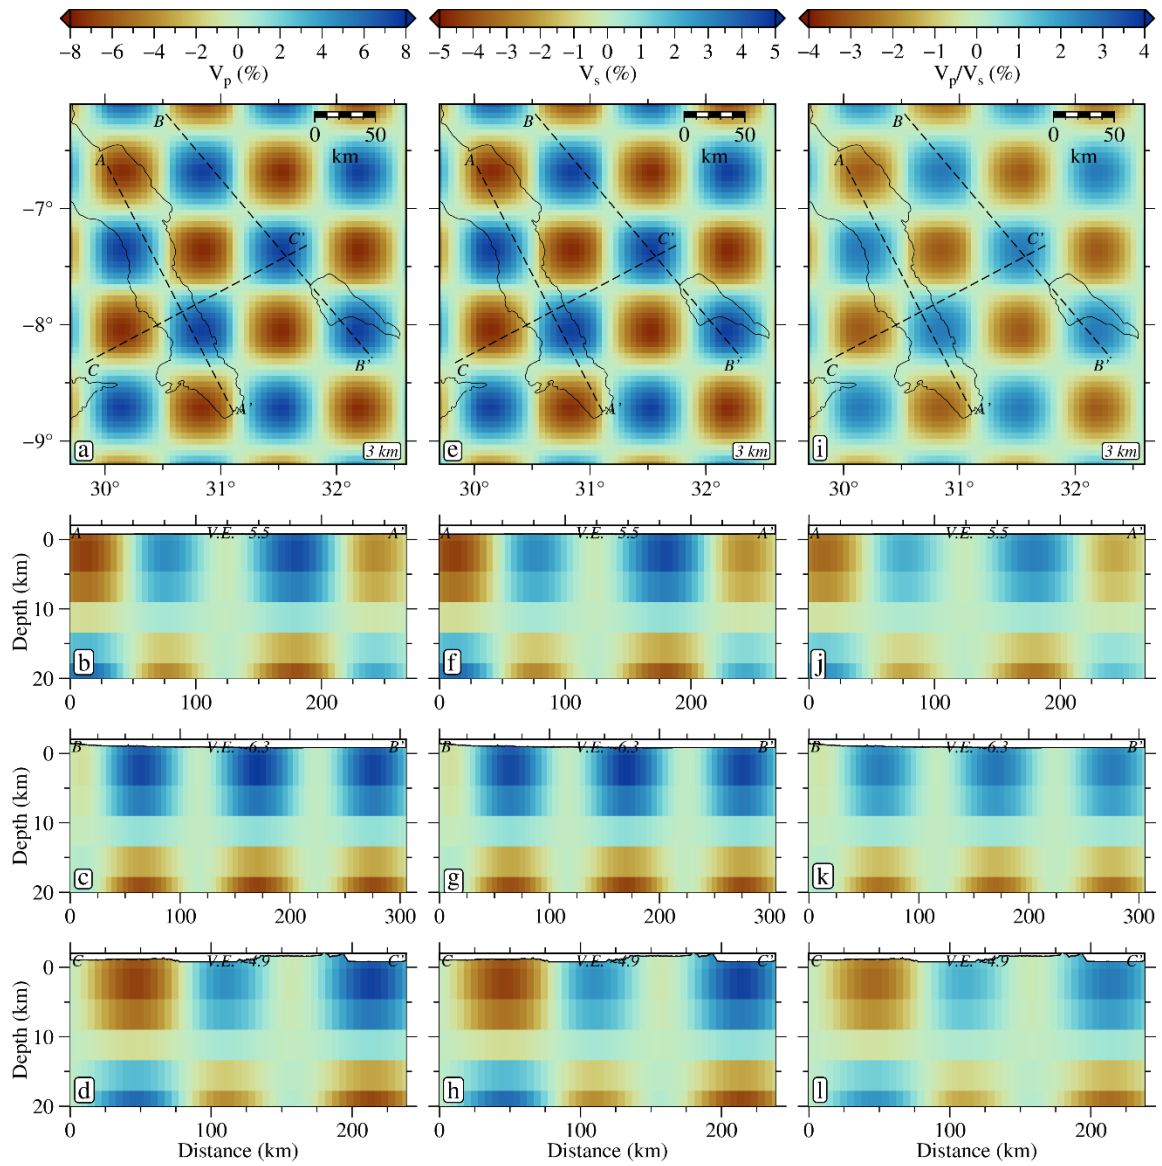

**Figure S8.** True synthetic model with 75 km x 75 km x 25 km checkers.

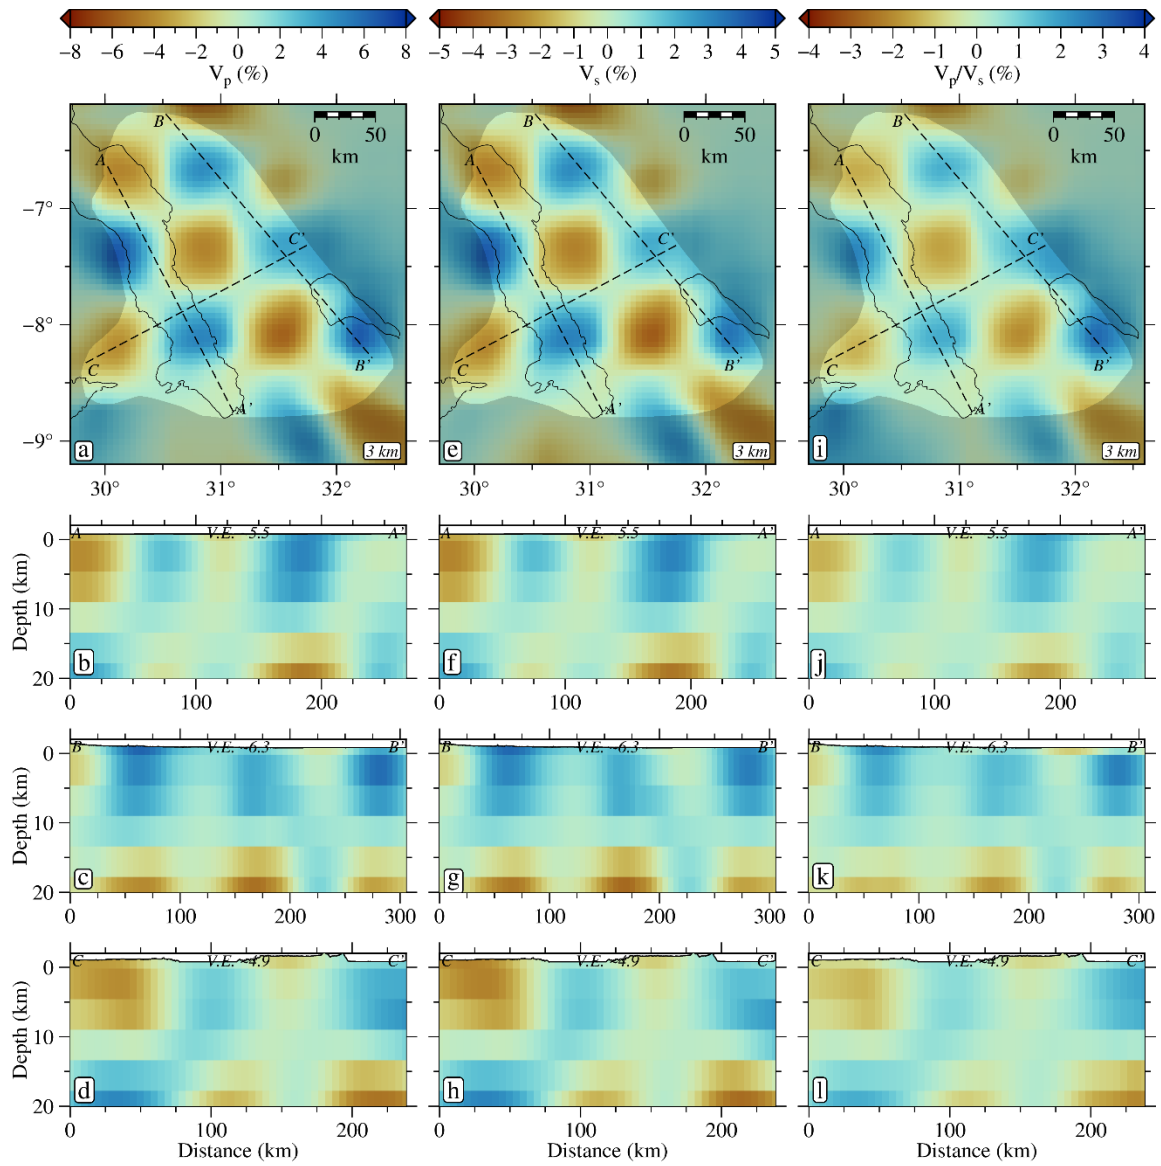

**Figure S9.** Recovered synthetic model with 75 km x 75 km x 25 km checkers. Unreliable areas of the models are lightly grayed out on the maps.

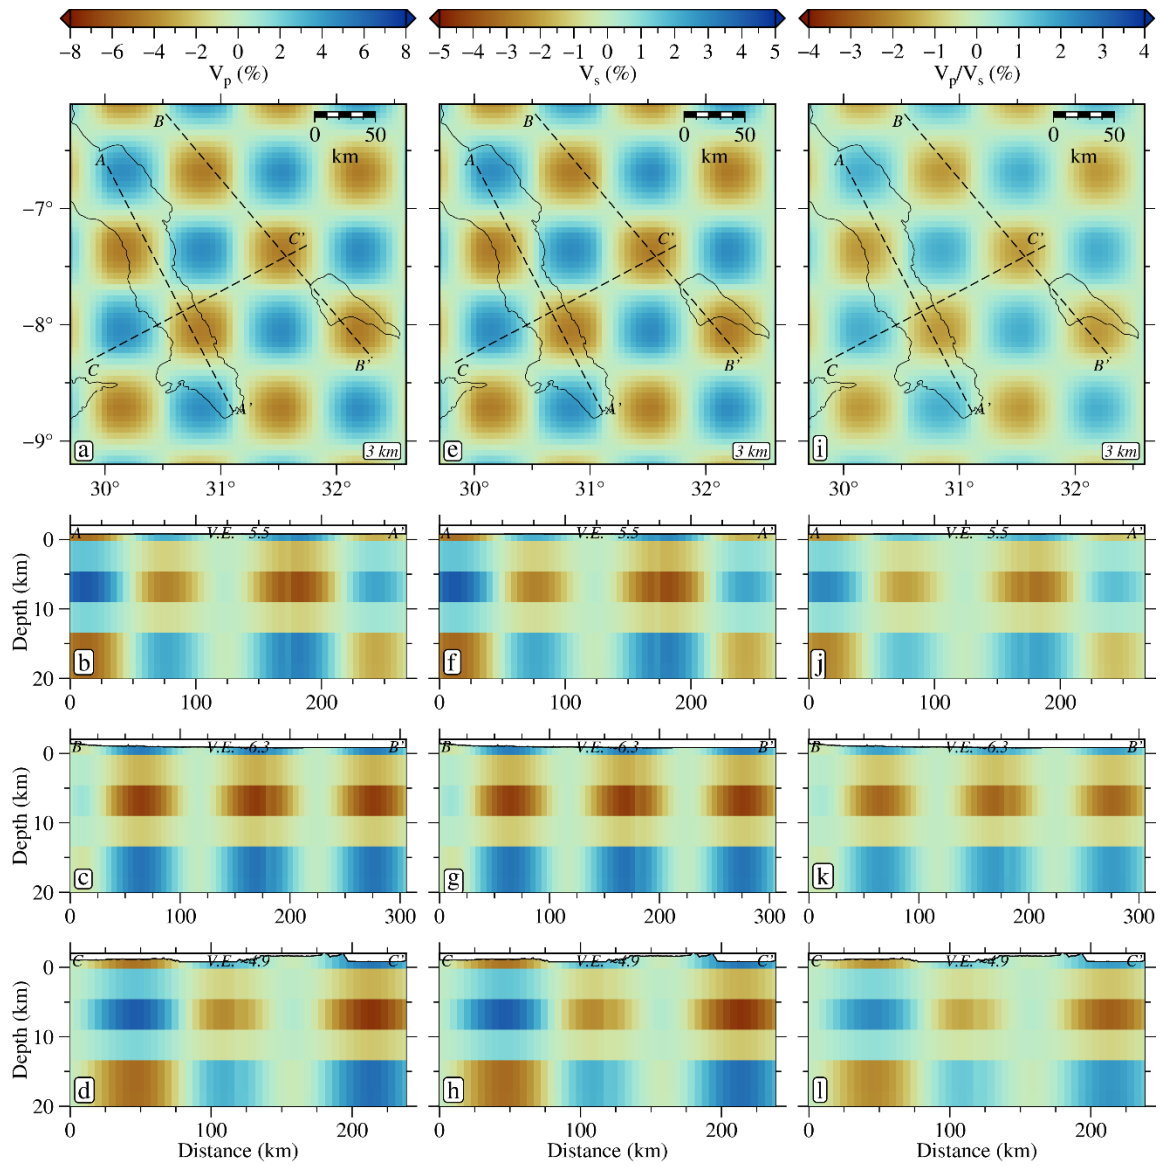

**Figure S10.** True synthetic model with 75 km x 75 km x 12.5 km checkers.



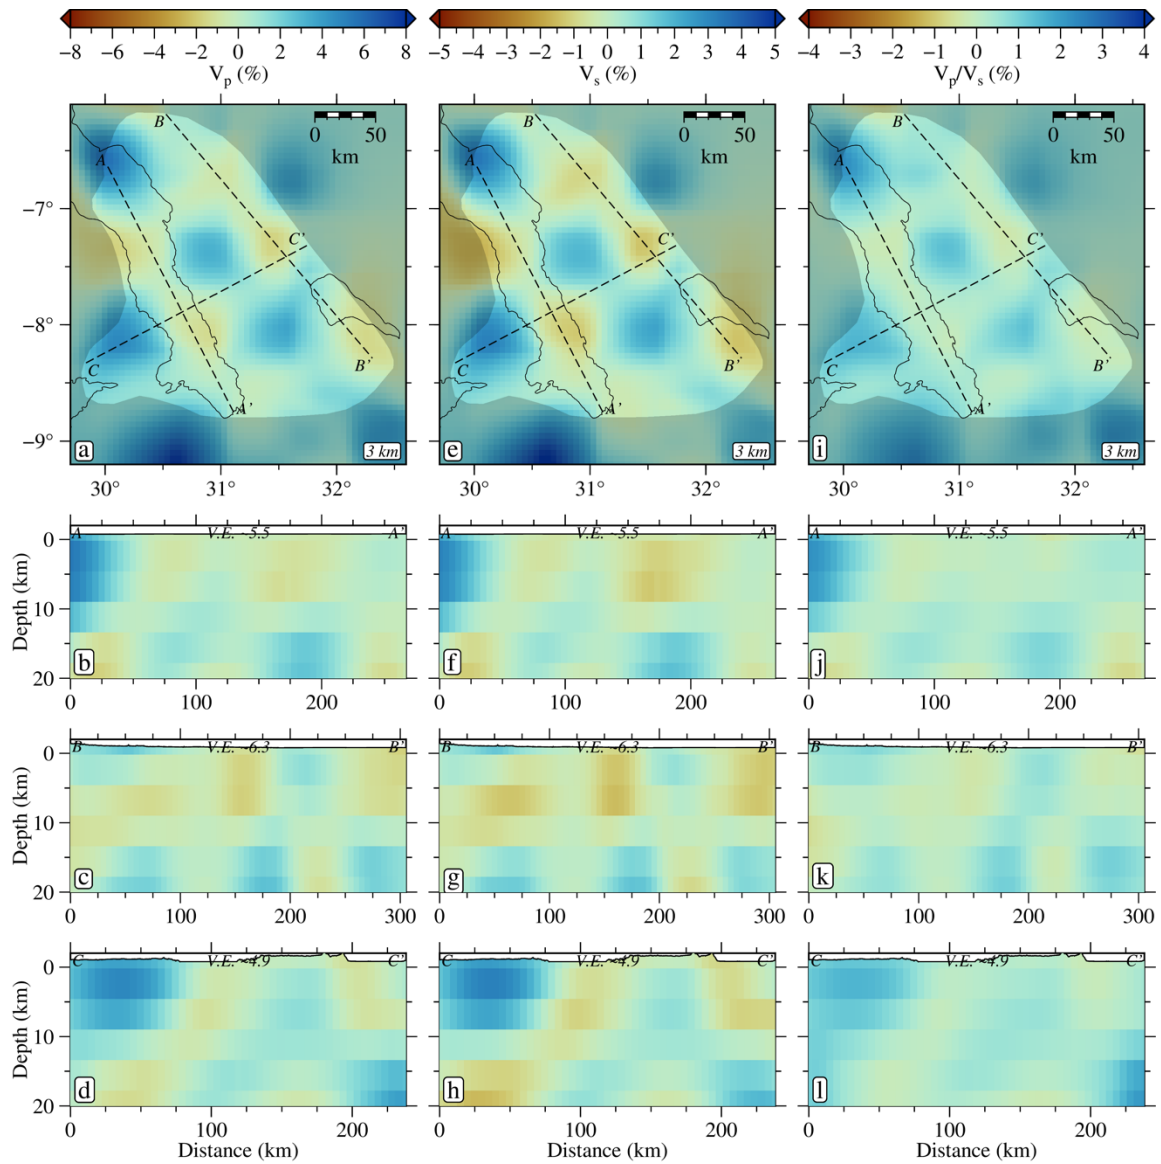

**Figure S11.** Recovered synthetic model with 75 km x 75 km x 12.5 km checkers. Unreliable areas of the models are lightly grayed out on the maps.

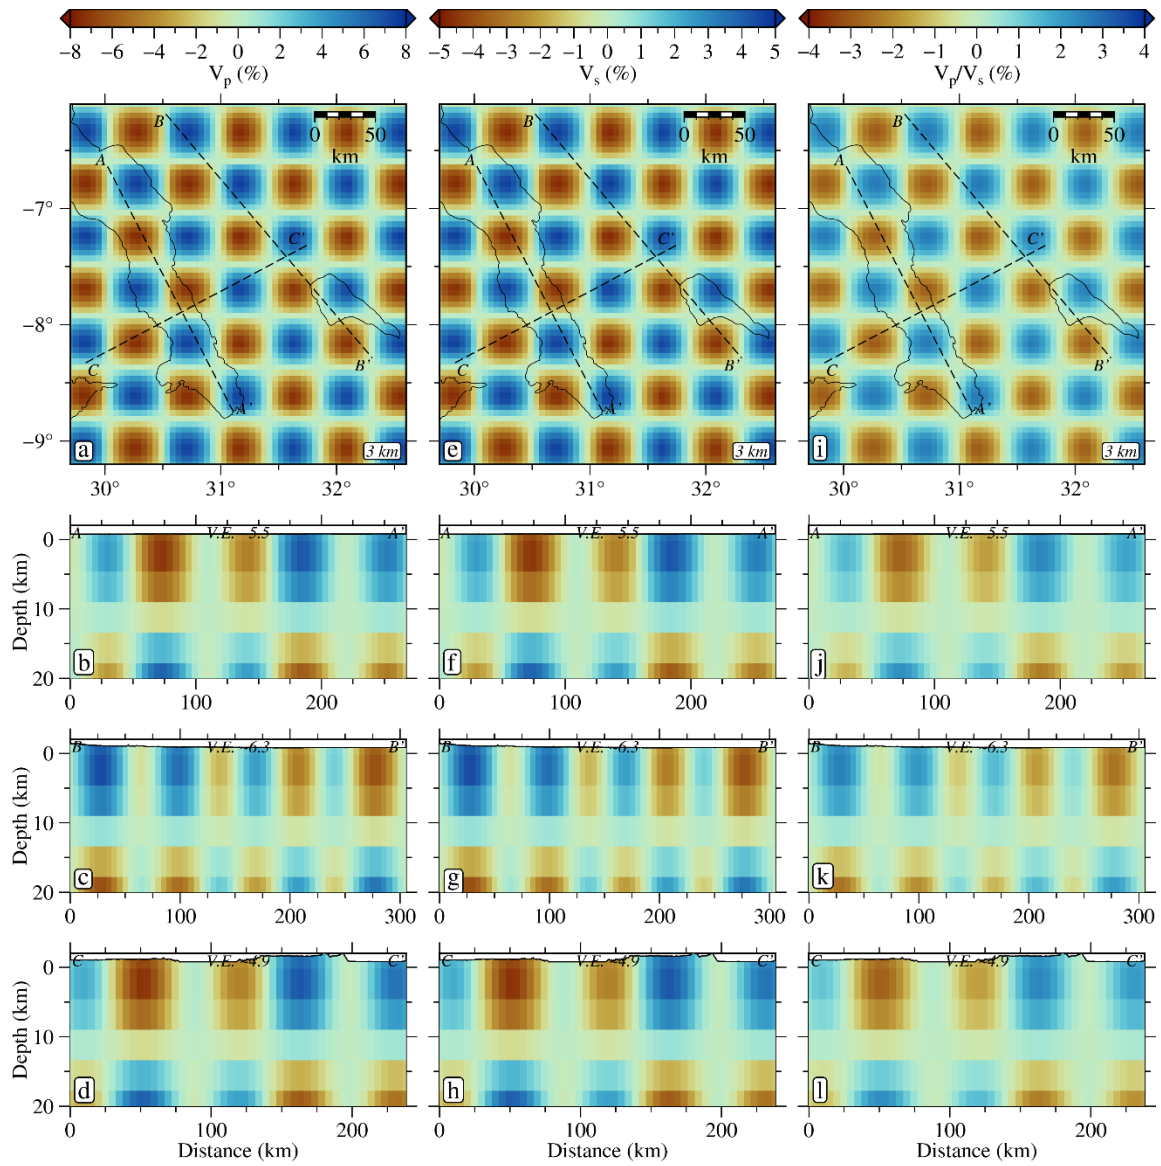

**Figure S12.** True synthetic model with 50 km x 50 km x 25 km checkers.

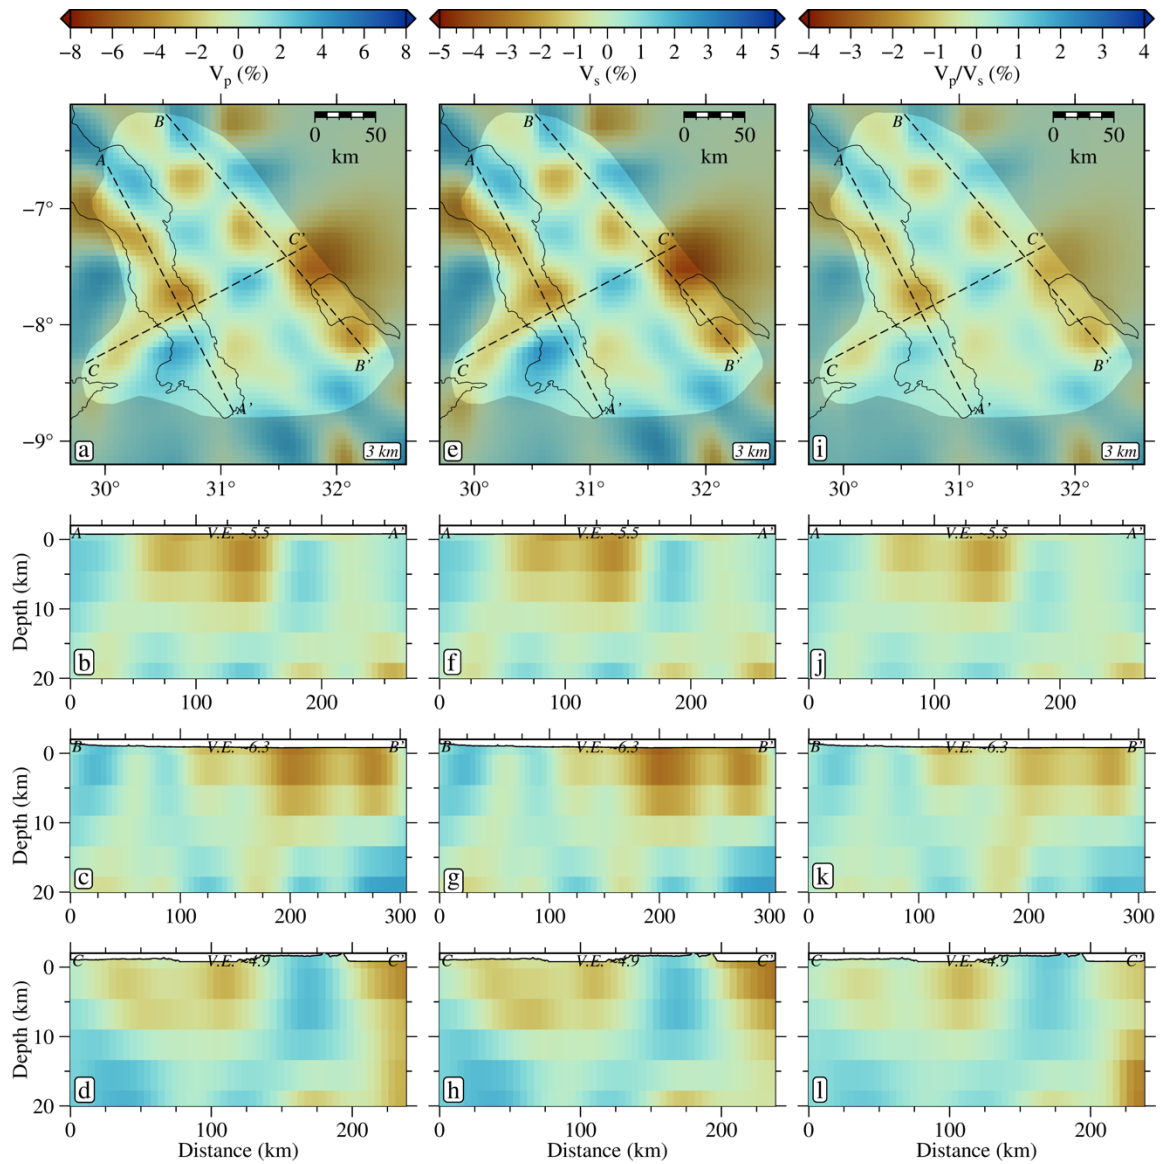

**Figure S13.** Recovered synthetic model with 50 km x 50 km x 25 km checkers. Unreliable areas of the models are lightly grayed out on the maps.

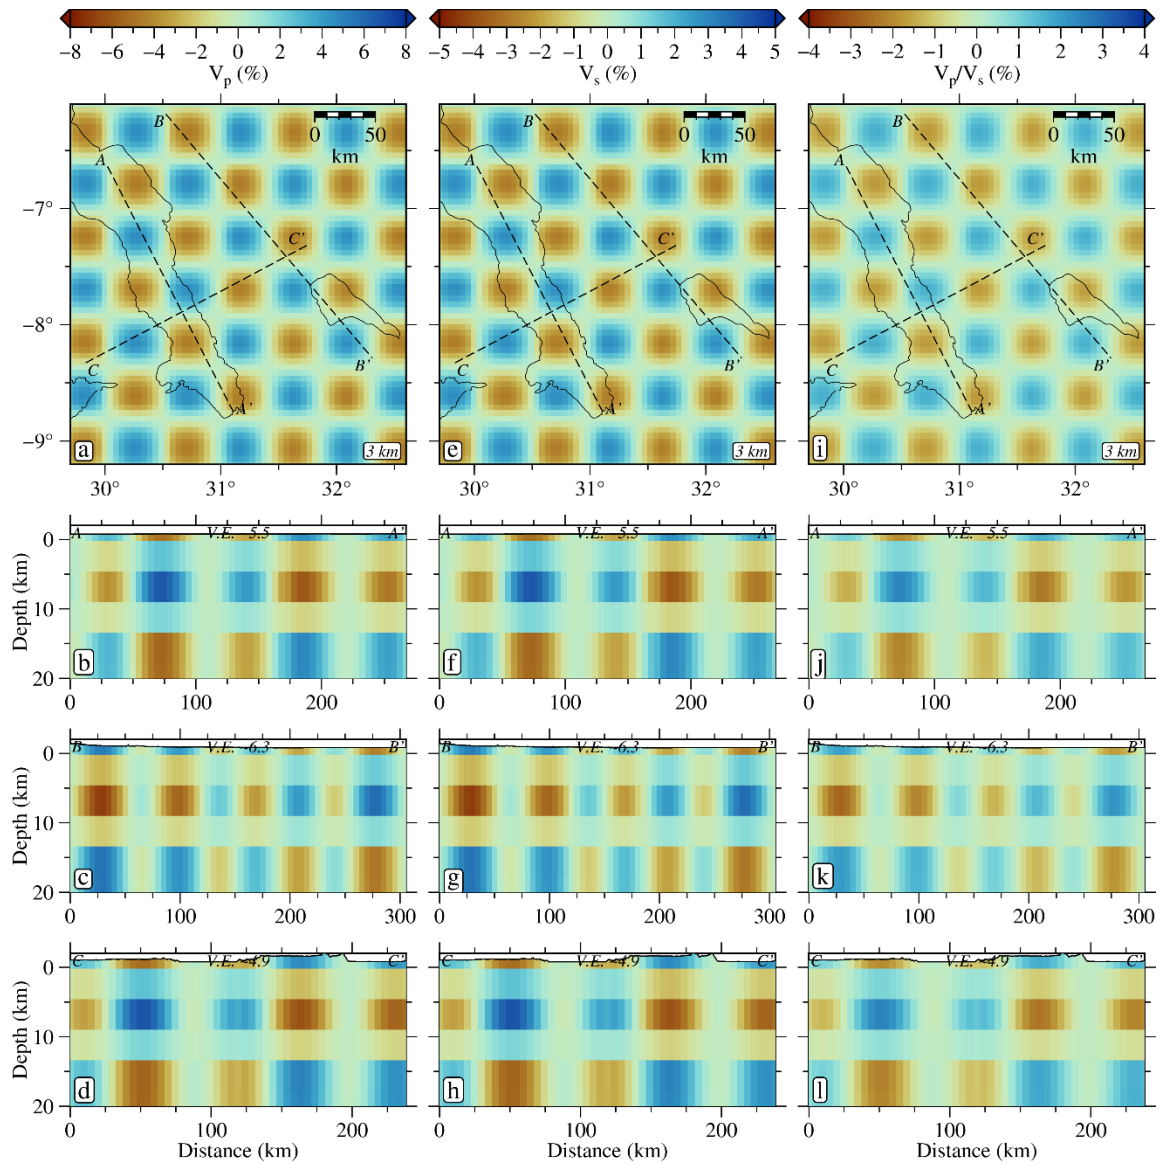

**Figure S14.** True synthetic model with 50 km x 50 km x 12.5 km checkers.

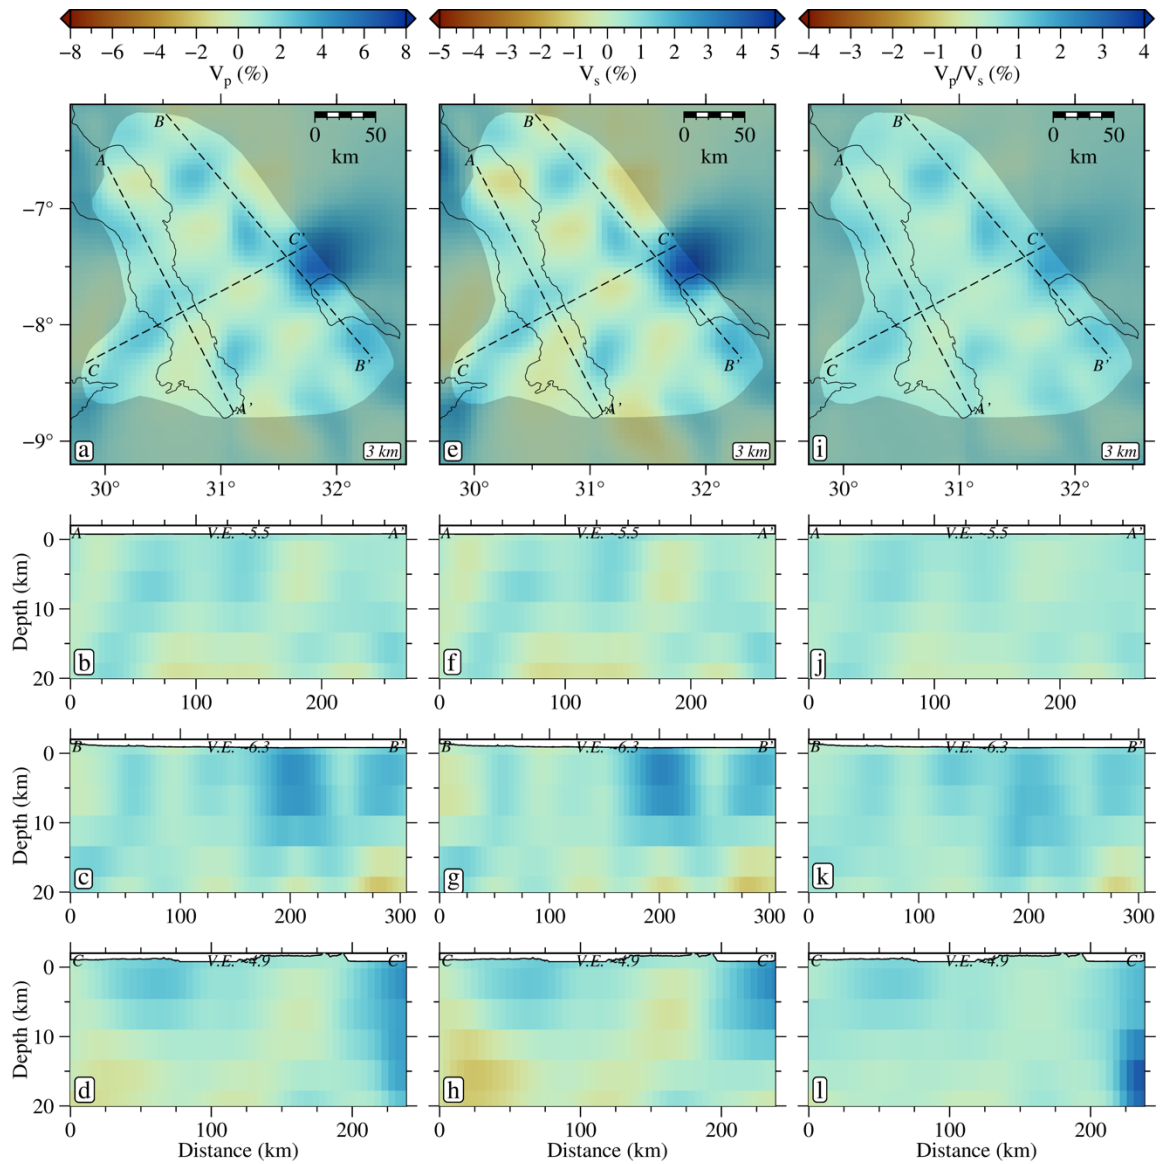

**Figure S15.** Recovered synthetic model with 50 km x 50 km x 12.5 km checkers. Unreliable areas of the models are lightly grayed out on the maps.

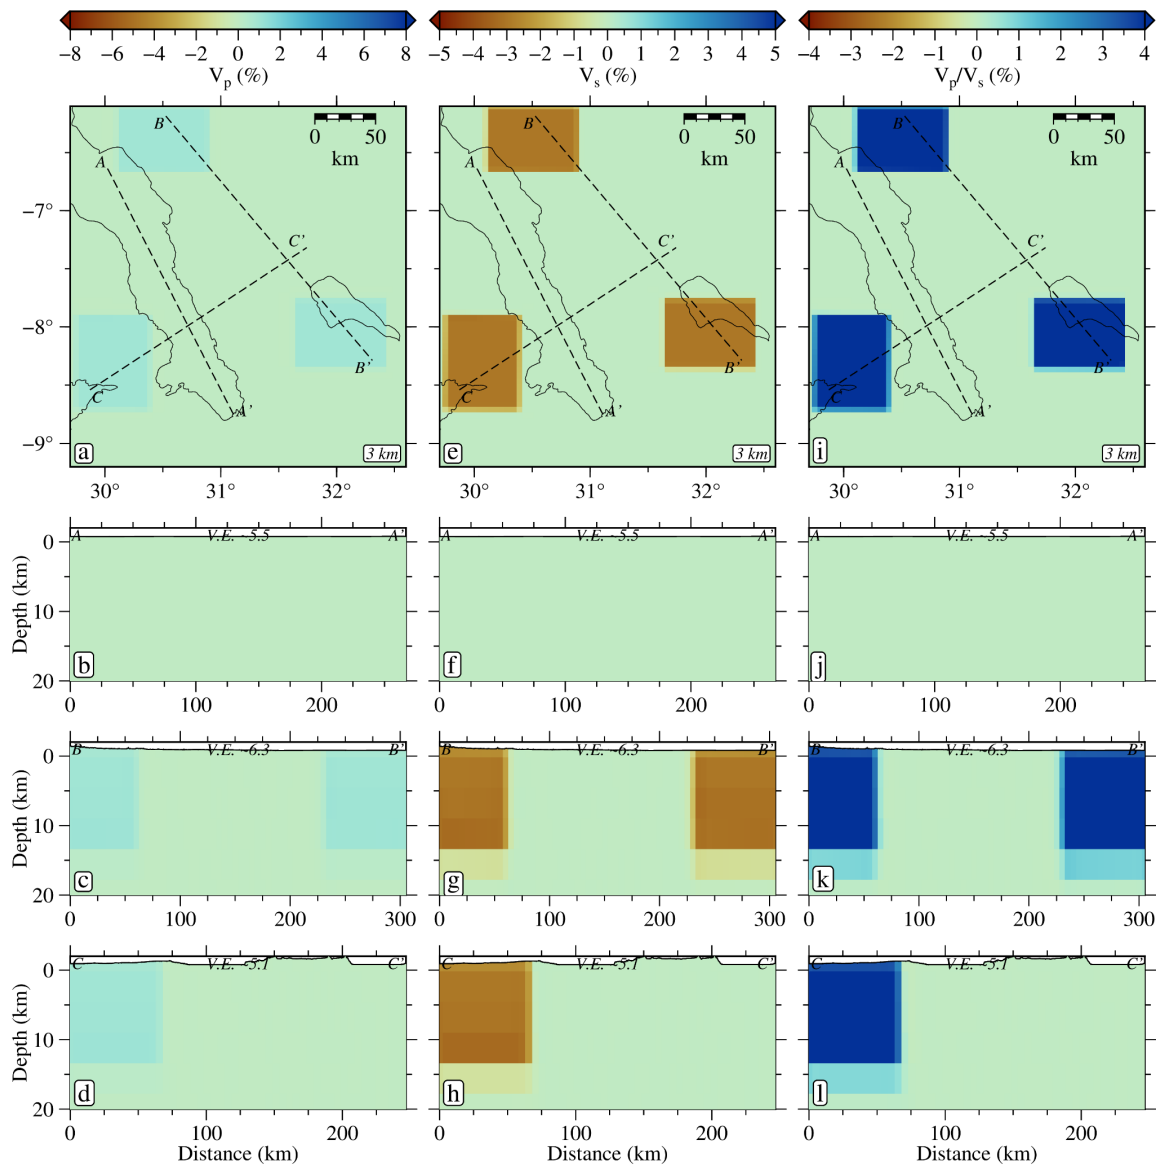

**Figure S16.** True custom synthetic model generated by perturbing the P (1% increase) and S (3% decrease) velocity models to generate three  $V_p/V_s$  (~4 % increase) anomalies. (a) 3 km depth slice through the P wave velocity model. Dashed black lines show the profile locations in b - l. (b - d) Profiles of the P wave velocity model. (e - h) Same as a-d but for the S wave velocity model. (i - l) Same as a-d but for the  $V_p/V_s$  ratios.

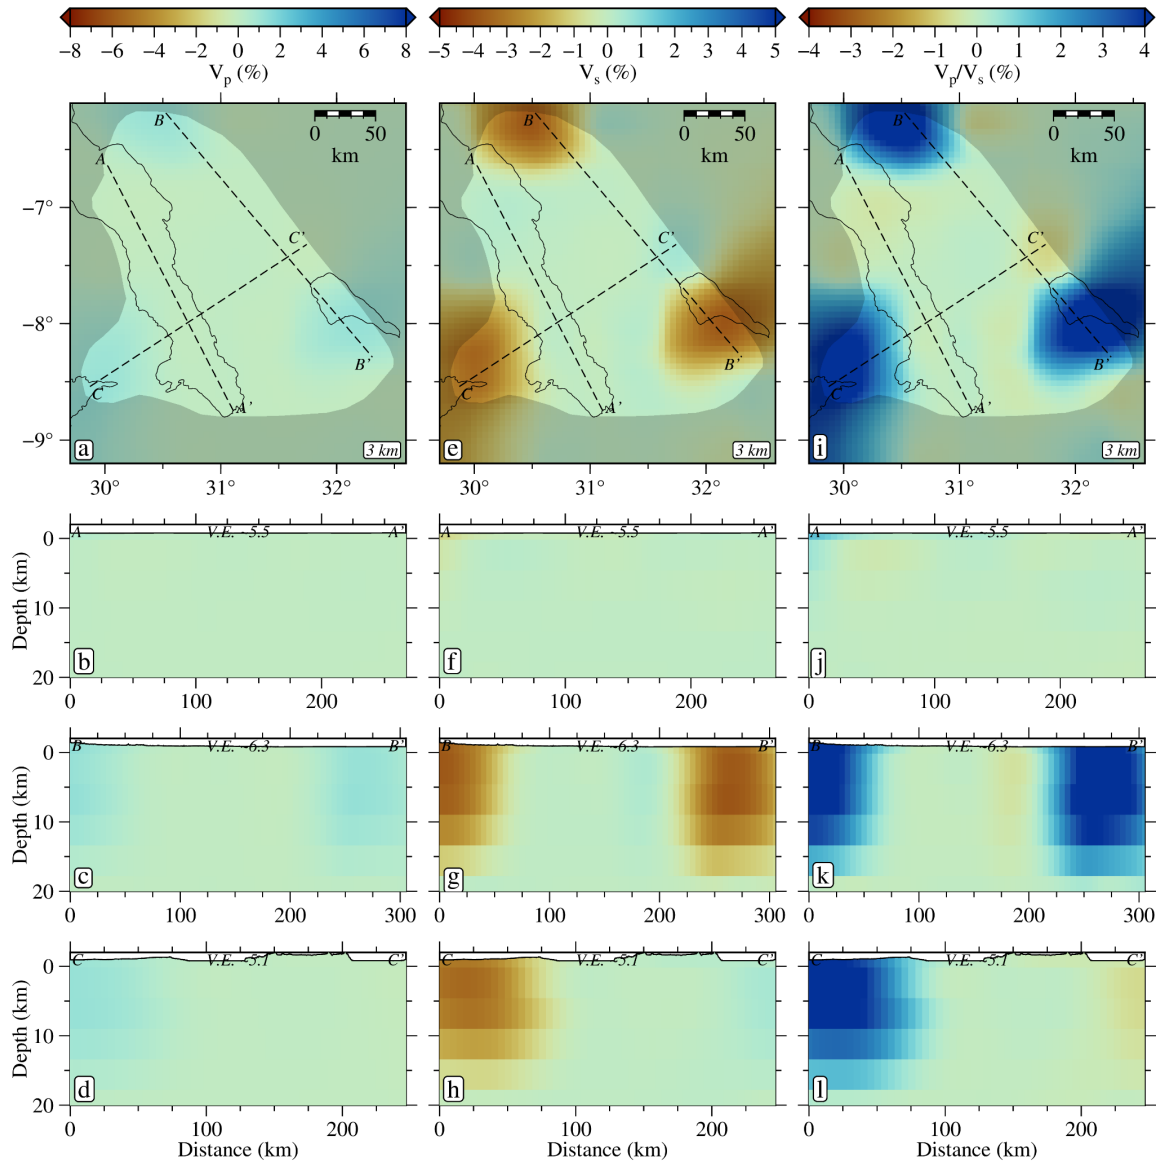

**Figure S17.** Recovered custom synthetic model from Fig. S16. (a) 3 km depth slice through the P wave velocity model. Dashed black lines show the profile locations in in b - l. Unreliable areas of the model are lightly grayed out. (b - d) Profiles of the P wave velocity model. (e - h) Same as a-d but for the S wave velocity model. (i - l) Same as a-d but for the  $V_p/V_s$  ratios.

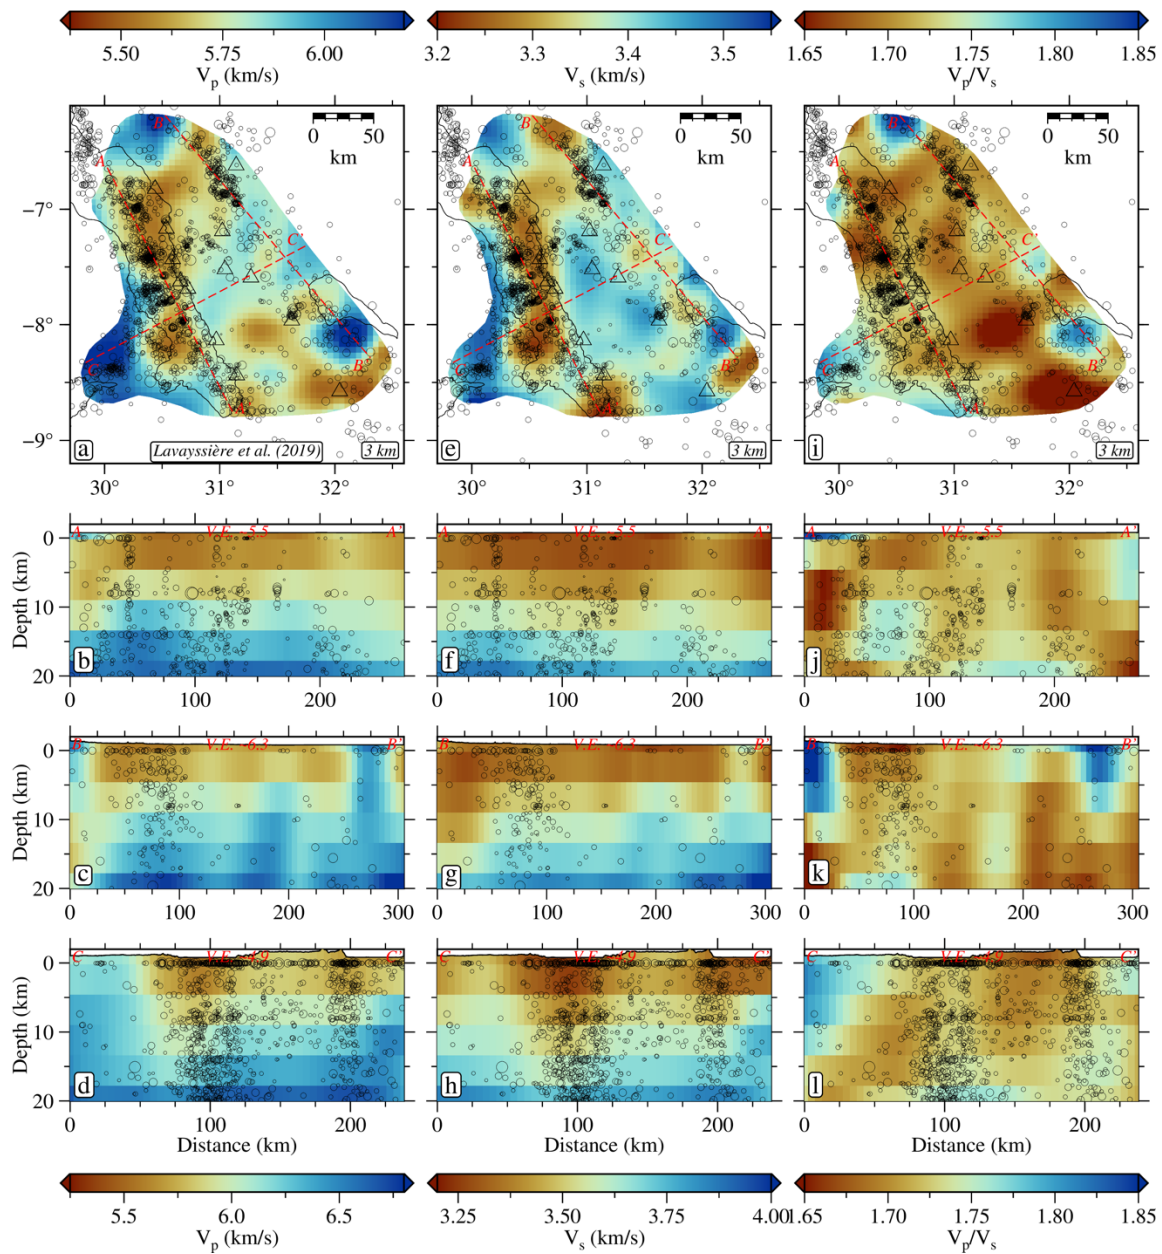

**Figure S18.** Same as Figure 3 in the manuscript but showing the absolute values of the model parameters rather than perturbations relative to the starting 1D models of Lavayssière et al. (2019).



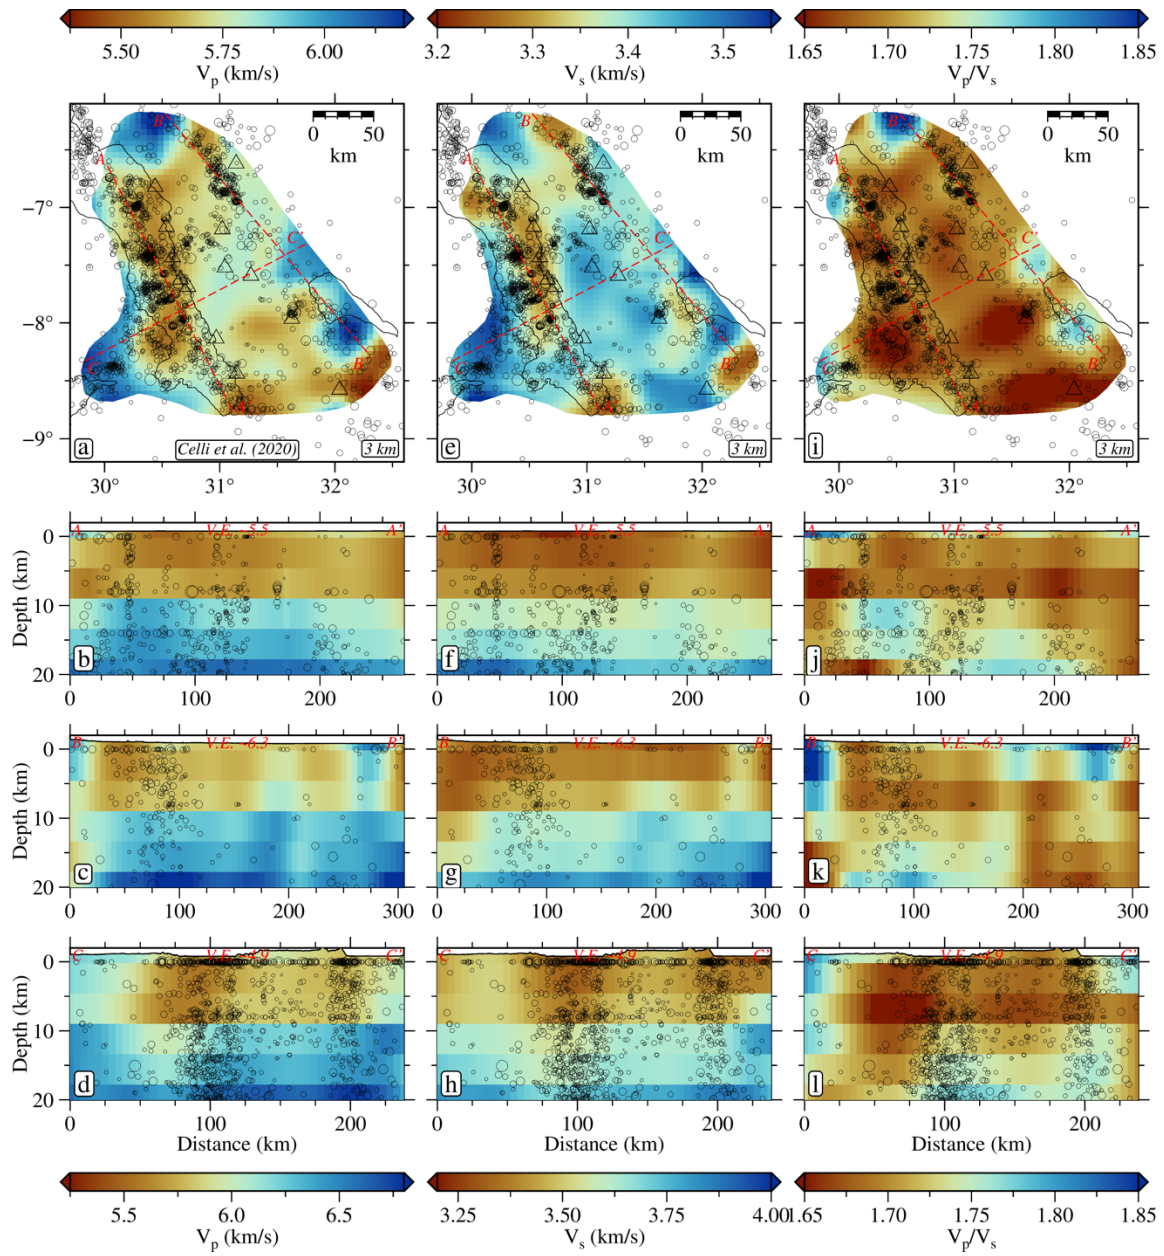

**Figure S19.** Inverted model results using the 3D regional P and S tomographic models of Celli et al. (2020) as starting models.

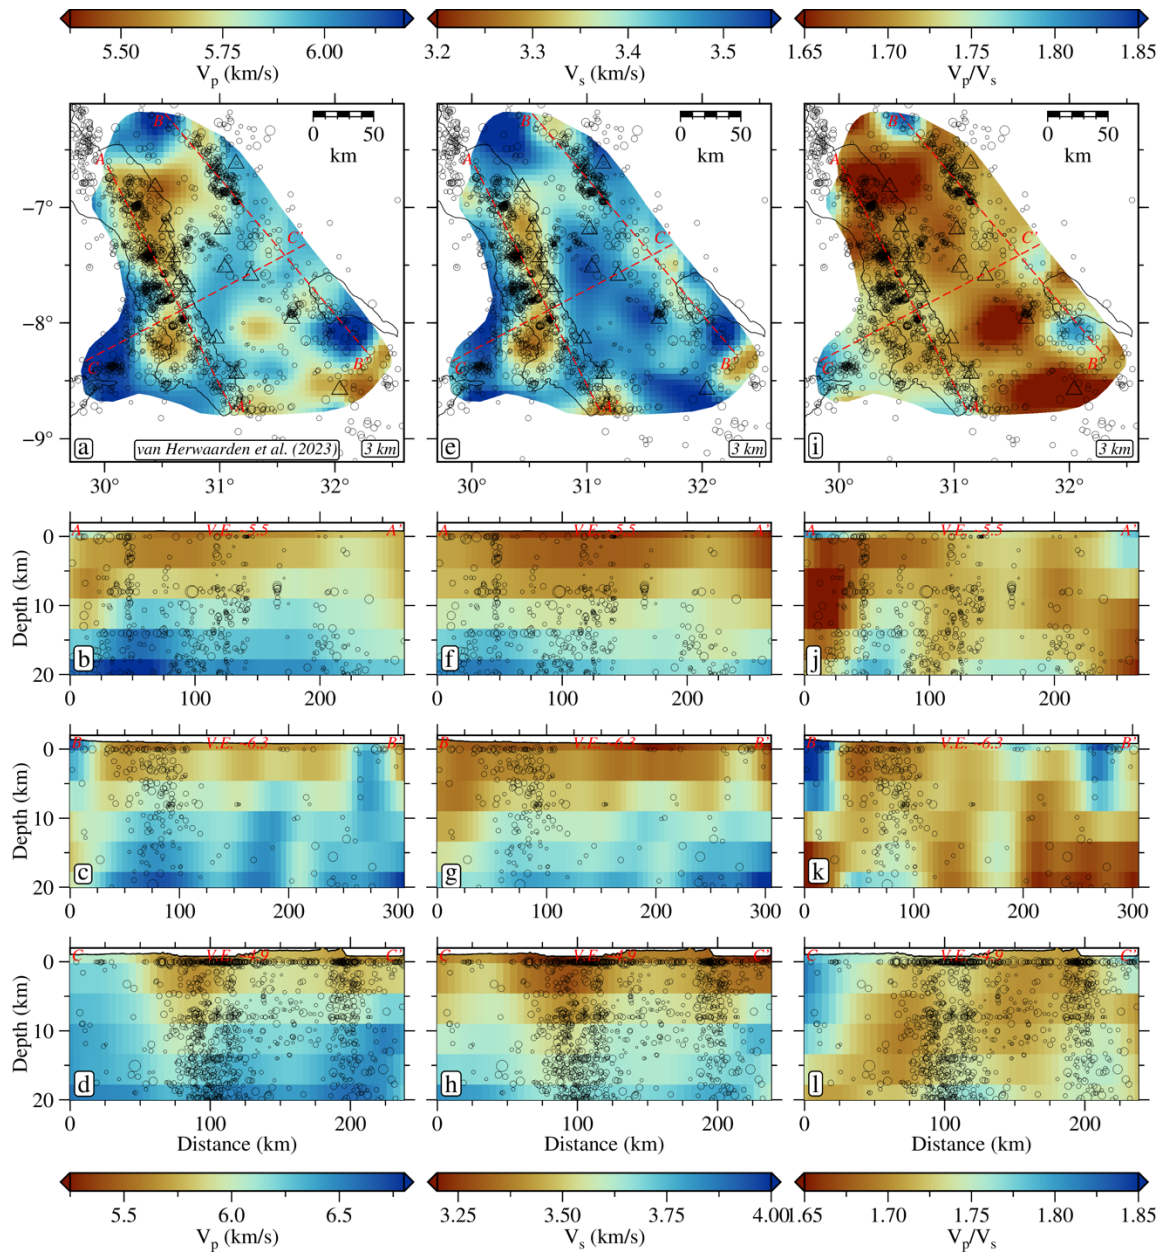

**Figure S20.** Inverted model results using the 3D regional P and S tomographic models of van Herwaarden et al. (2023) as starting models.

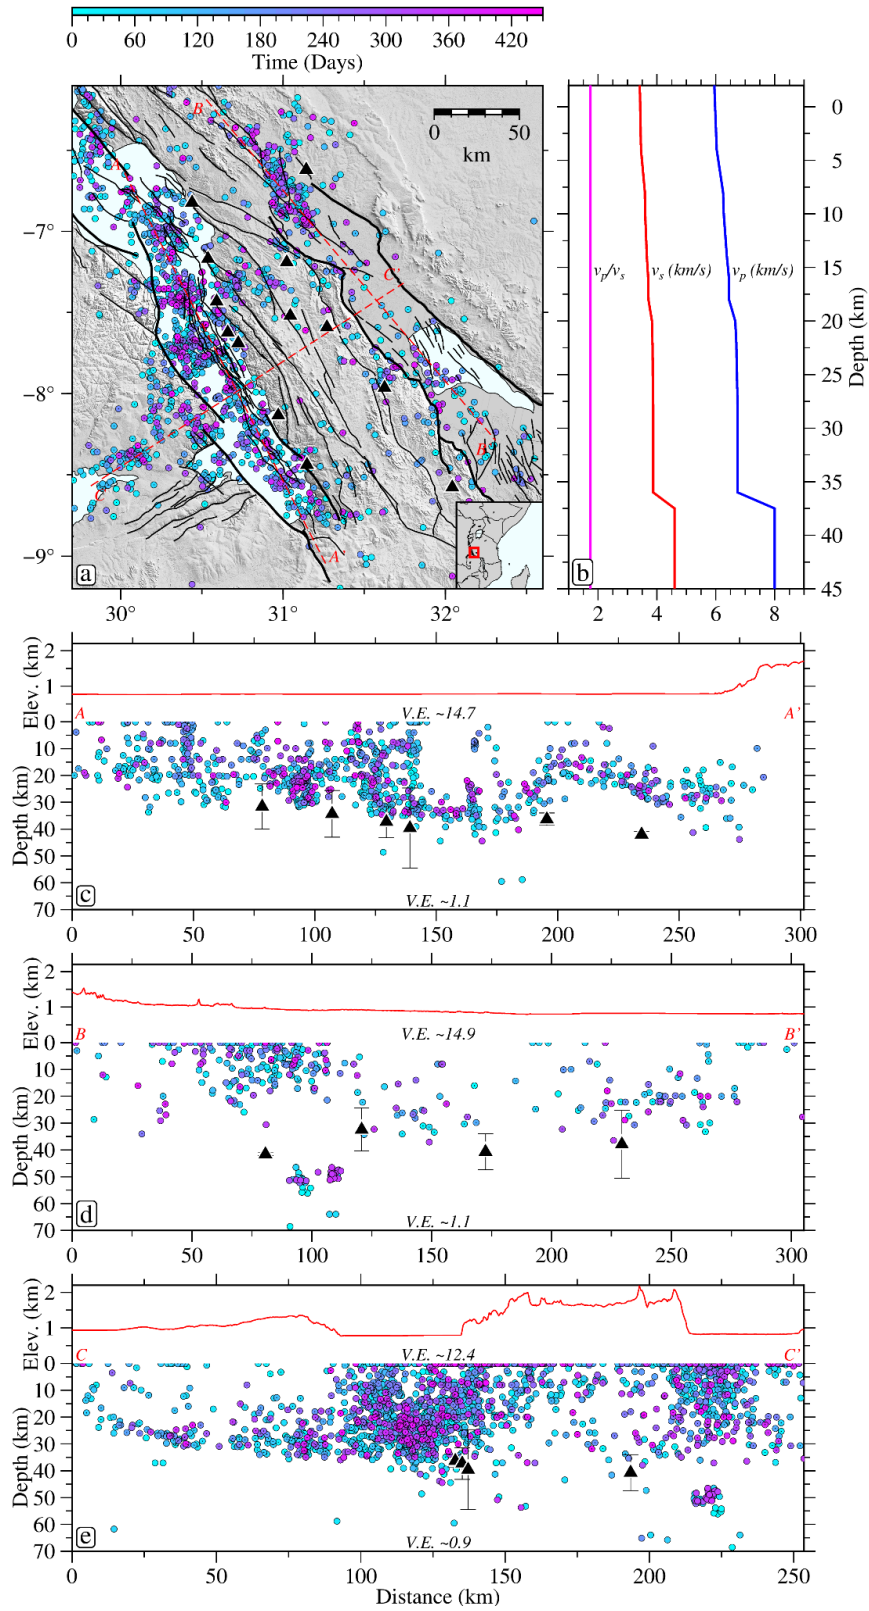

**Figure S21.** Similar to Fig. 2, with the seismicity colored according to their occurrence time relative to the earliest event in the catalog.

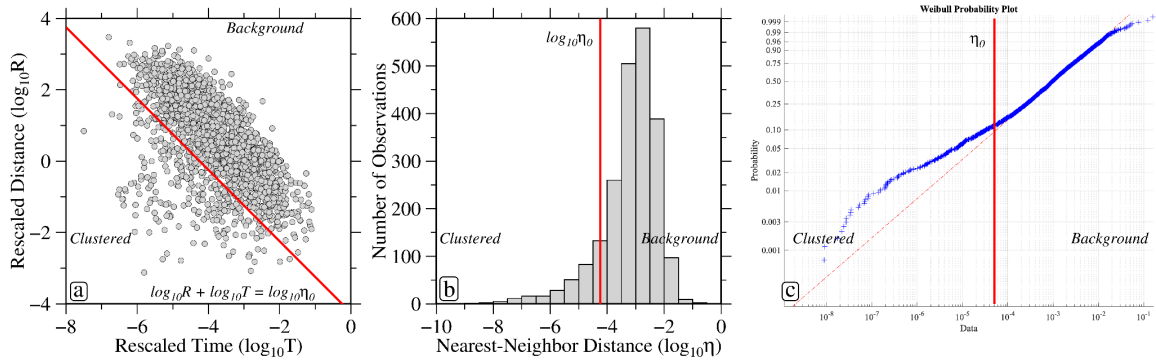

**Figure S22.** Cluster analysis result. **(a)** Map of time ( $T$ ) and distance ( $R$ ) components of the nearest-neighbor distance for each earthquake in the catalog. The red line separates the clustered events (below the line) from the background events (on or above the line). **(b)** Histogram showing the distribution of the nearest-neighbor distances. **(c)** Probability plot comparing the distribution of the nearest-neighbor distances (blue plus symbols) to a Weibull distribution (red dashed line). The deviation of the data from the Weibull distribution indicates that the seismicity does not represent a Poissonian (background) catalog. The deviation occurs approximately around the estimated separation threshold (red line).

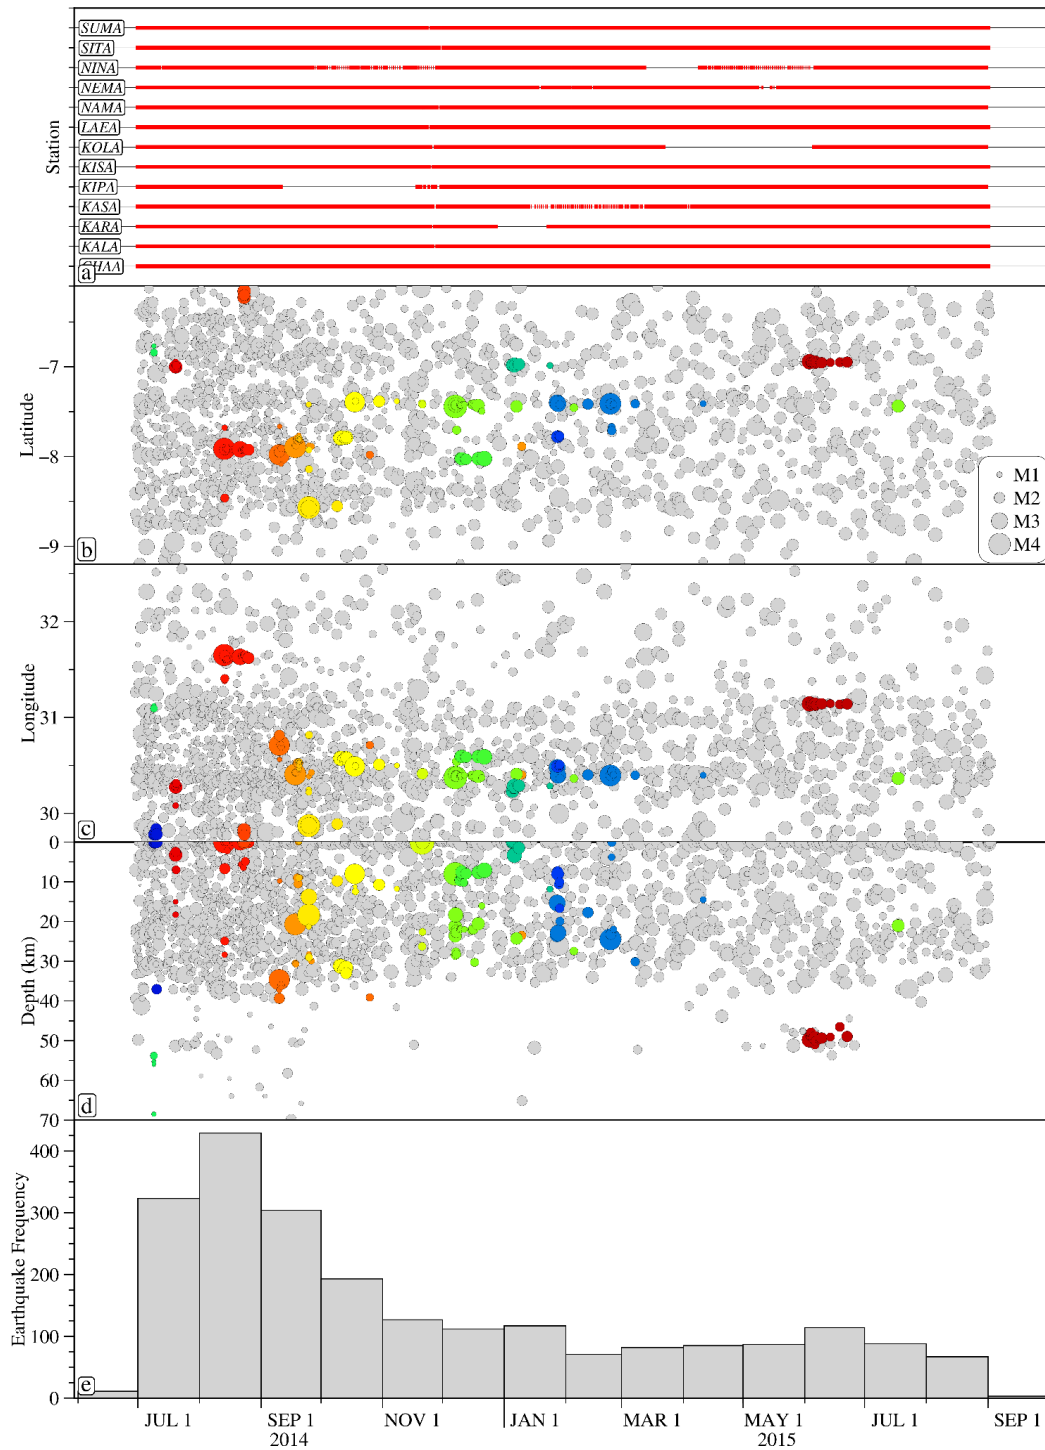

**Figure S23.** Network data continuity, earthquake clusters, and seismicity distribution as functions of time. **(a)** Data availability plot for stations in the TANGA14 array. The red line indicates periods when the seismometer was operational. **(b)** Seismicity as a function of time and latitude. Clusters are colored. **(c)** Same as panel b but as a function of longitude. **(d)** Same as panel b but as a function of depth. **(e)** Histogram of the events in the catalog for each month during deployment.



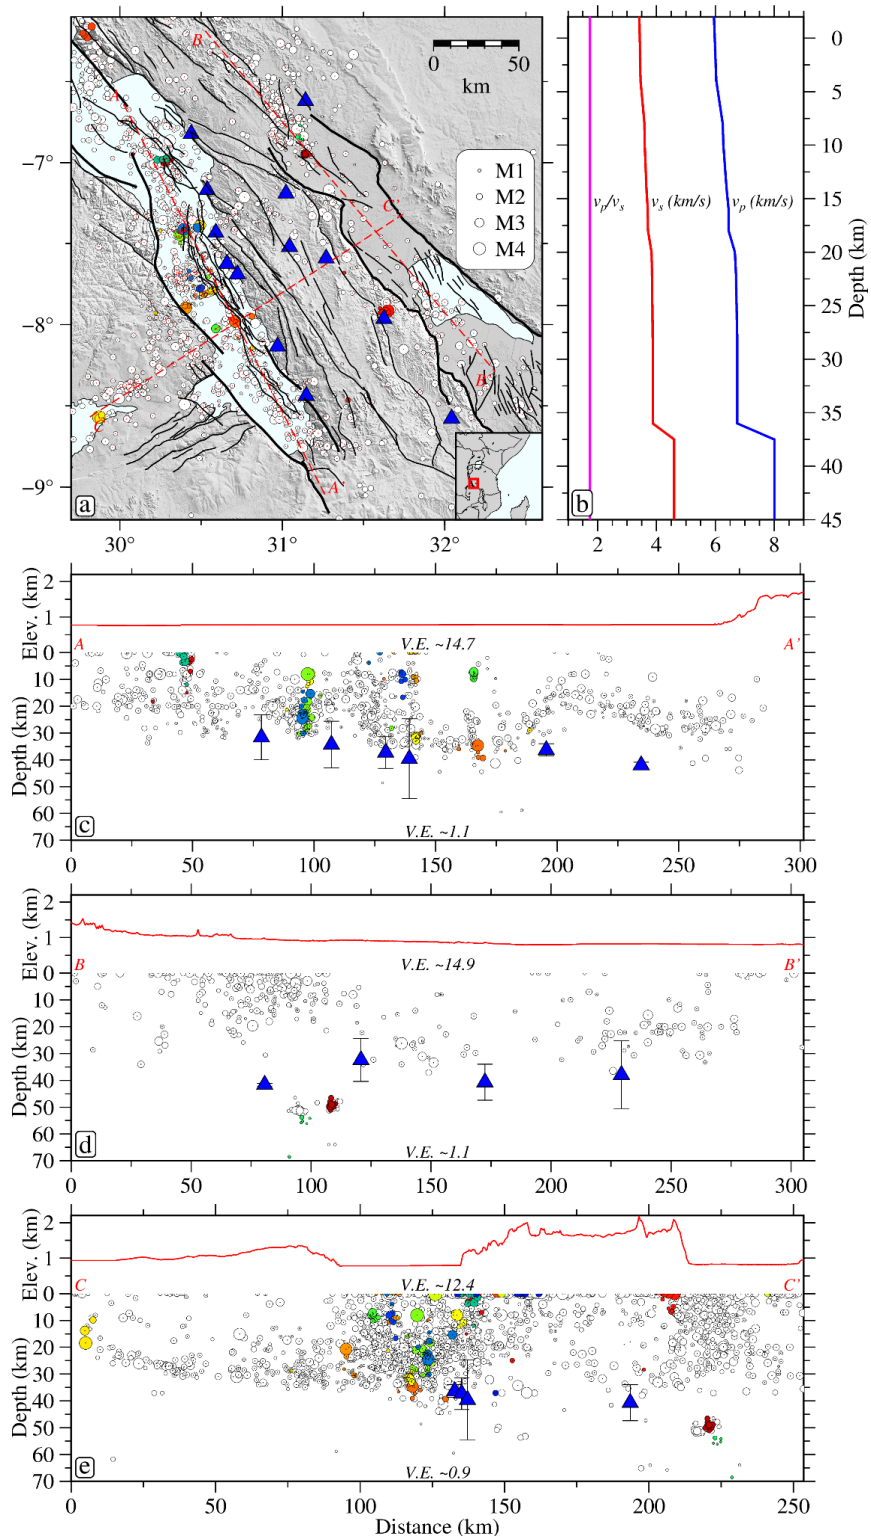

**Figure S24.** Similar to Fig. 2, with the clusters highlighted (colored circles).

### References

- Celli, N. L., Lebedev, S., Schaeffer, A. J., & Gaina, C. (2020). African cratonic lithosphere carved by mantle plumes. *Nature Communications*, *11*(92), 1-10.
- Lavayssière, A., Drooff, C., Ebinger, C. J., Gallacher, R., Illsley-Kemp, F., Oliva, S. J., & Keir, D. (2019). Depth Extent and Kinematics of Faulting in the Southern Tanganyika Rift, Africa. *Tectonics*, *38*, 842-862.
- van Herwaarden, D., Thrastarson, S., Halpa, V., Afanasiev, M., Trampert, J., & Fichtner, A. (2023). Full-Waveform Tomography of the African Plate Using Dynamic Mini-Batches. *Journal of Geophysical Research: Solid Earth*, *126*, 1-22.
